# Supplementary material for: Dual functions of pH-sensitive cation Zr-MOF for 5-Fu: large drug-loading capacity and high-sensitivity fluorescence detection
Source: Royal Society of Chemistry journal article supplement (doi:10.1039/d1dt01772a), 2021-01-01
Supplement: d1dt01772a1.pdf [file d1dt01772a1.pdf]

## Supplementary Information

# Dual Functions of pH-sensitive Cation Zr-MOF for 5-Fu: Large Drug Loading Capacity and High Sensitivity Fluorescence Detection

Xi-yu Sun,<sup>a</sup> Hong-jing Zhang,<sup>a</sup> Xiao-yang Zhao,<sup>a</sup> Qian Sun,<sup>\*\*</sup> Yuan-yuan Wang,<sup>a</sup> and En-Qing Gao<sup>b</sup>

<sup>a</sup> Department of chemistry, School of Chemistry and Molecular Engineering, East China Normal University, Shanghai 200241, P. R. China

<sup>b</sup> Shanghai key laboratory of Green Chemistry and Chemical Processes, School of Chemistry and Molecular Engineering, East China Normal University, Shanghai 200062, P. R. China.

## 1. Experimental procedures

### Synthesis of ligand 9H-carbazole-2,7 dicarboxylic acid (9H-2,7-CDC)

The ligand 9H-carbazole-2,7 dicarboxylic acid (9H-2,7-CDC) was synthesized according to a literature report.<sup>[i]</sup> Summarily, dimethyl 4,4'-biphenyldicarboxylate (Me<sub>2</sub>BPDC) (5.03g) and 45ml of 98% concentrated sulfuric acid was mixed and stirred mechanically at room temperature until to green solution. Reduce the temperature of the solution to 5° C and continue stirring for one hour. Then, 1.8ml 56% HNO<sub>3</sub> and 5ml 98% concentrated sulfuric acid was added dropwise. The reaction solution was poured onto crushed ice, and a milky white solid was precipitated immediately. The obtained solid dimethyl 2-nitro-4,4'-bipthalate (Me<sub>2</sub>BPDC-NO<sub>2</sub>) was mixed with triphenylphosphonium (DPh<sub>3</sub>) (8.2782 g), adding 26 ml o-dichlorobenzene, heating at 180° C, and refluxing for 48h. The mixture was dissolved in tetrahydrofuran and reflux at 60° C for 19 hours. The reaction solution was evaporated under a vacuum rotary to obtain a solid powder, dissolved in water, and filtered to remove the insoluble Ph<sub>3</sub>PO. The filtrate was adjusted to acid with dilute hydrochloric acid, filtered, and dried to obtain a brown powder (9H-carbazole-2,7 dicarboxylic acid, 9H-2,7-CDC) 1.105g (yield 23.26%).

## 2. Characterization

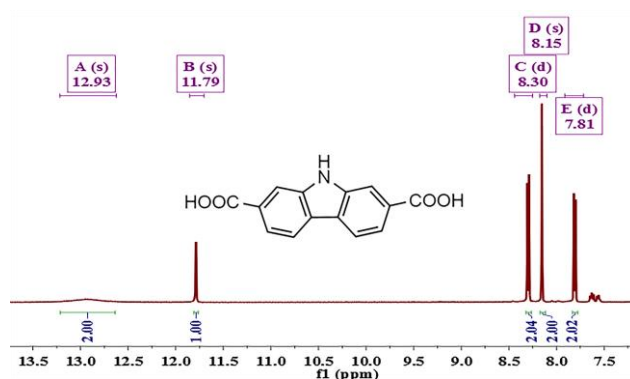

**Figure S1** <sup>1</sup>H NMR spectrum of ligand 9H-carbazole-2,7 dicarboxylic acid (9H-2,7-CDC)

<sup>1</sup>H NMR (500 MHz, DMSO) δ 12.93 (s, 1H), 11.79 (s, 1H), 8.30 (d, *J* = 8.2 Hz, 1H), 8.15 (s, 1H), 7.81 (d, *J* = 8.2 Hz, 1H).

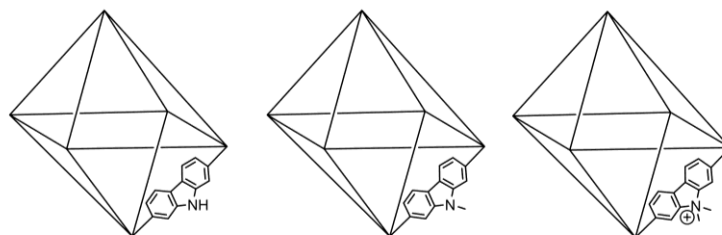

**Figure S2** The three products after MeOTf methylation, from left to right, UiO-67-CDC, UiO-67-CDC-CH<sub>3</sub>, UiO-67-CDC-(CH<sub>3</sub>)<sub>2</sub>

**Table S1** The yield of the three products after methylation

| product   | UiO-67-CDC-(CH <sub>3</sub> ) <sub>2</sub> | UiO-67-CDC-CH <sub>3</sub> | UiO-67-CDC |
|-----------|--------------------------------------------|----------------------------|------------|
| Yield (%) | 49.1                                       | 32.1                       | 18.8       |

### 3. Standard curve of 5-Fu

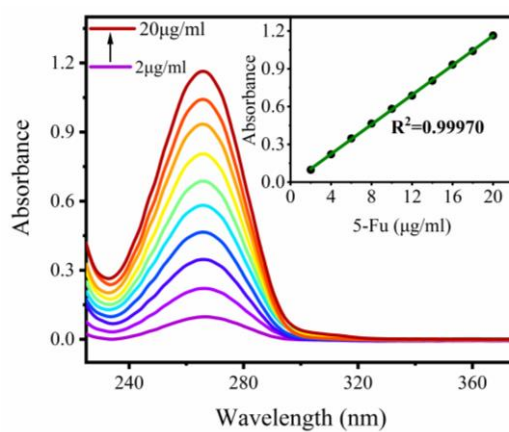

**Figure S3** Standard curve of 5-Fu in ethanol

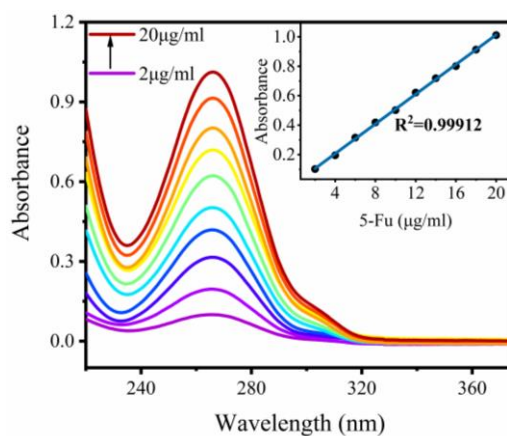

**Figure S4** Standard curve of 5-Fu in PBS solution

#### 4. Zeta potential

**Table S2** Zeta potential of UiO-67-CDC, UiO-67-CDC-(CH<sub>3</sub>)<sub>2</sub> and 5-Fu@UiO-67-CDC-(CH<sub>3</sub>)<sub>2</sub>

| Sample | UiO-67-CDC | UiO-67-CDC-(CH <sub>3</sub> ) <sub>2</sub> | 5-Fu@UiO-67-CDC-(CH <sub>3</sub> ) <sub>2</sub> |
|--------|------------|--------------------------------------------|-------------------------------------------------|
| ζ (mV) | 0.229      | 22.017                                     | -0.106                                          |

#### 5. The fitting of kinetic models

**Table S3** Summary of four types of kinetic model fitting tables for drug sustained-release behavior under different pH conditions

| PH     | Model            | Equation                                         | Correlation coefficients (R <sup>2</sup> ) |
|--------|------------------|--------------------------------------------------|--------------------------------------------|
| PH=7.4 | Korsmeyer-Peppas | $y=3297 \times x^{5.32054E-5} - 3297$            | 0.78103                                    |
|        | Higuchi          | $y=0.14373 \times x^{0.5} + 0.2756$              | 0.60220                                    |
|        | Weibull          | $y=0.87973 \times (1 - e^{-1.18077x})^{0.44827}$ | 0.99114                                    |
|        | First order      | $y=0.87973 \times (1 - e^{-0.52931x})$           | 0.99213                                    |
| PH=6.8 | Korsmeyer-Peppas | $y=2397 \times x^{6.71748E-5} - 2397$            | 0.86138                                    |
|        | Higuchi          | $y=0.13127 \times x^{0.5} + 0.20544$             | 0.68094                                    |
|        | Weibull          | $y=0.76247 \times (1 - e^{-1.39451x})^{0.32206}$ | 0.98931                                    |
|        | First order      | $y=0.76247 \times (1 - e^{-0.44911x})$           | 0.99050                                    |
| PH=5   | Korsmeyer-Peppas | $y=1803 \times x^{7.15013E-5} - 1803$            | 0.87101                                    |
|        | Higuchi          | $y=0.09999 \times x^{0.5} + 0.09093$             | 0.70426                                    |
|        | Weibull          | $y=0.5323 \times (1 - e^{-0.38331x})^{0.87146}$  | 0.97321                                    |
|        | First order      | $y=0.5323 \times (1 - e^{-0.33404x})$            | 0.97618                                    |
| PH=3   | Korsmeyer-Peppas | $y=0.02064 \times x^{0.32101} + 0.00364$         | 0.55848                                    |
|        | Higuchi          | $y=0.0103 \times x^{0.5} + 0.0121$               | 0.67984                                    |
|        | Weibull          | $y=0.06253 \times (1 - e^{-0.32729x})^{0.64221}$ | 0.6323                                     |
|        | First order      | $y=0.06253 \times (1 - e^{-0.21019x})$           | 0.67316                                    |

#### 6. Scanning electron micrograph

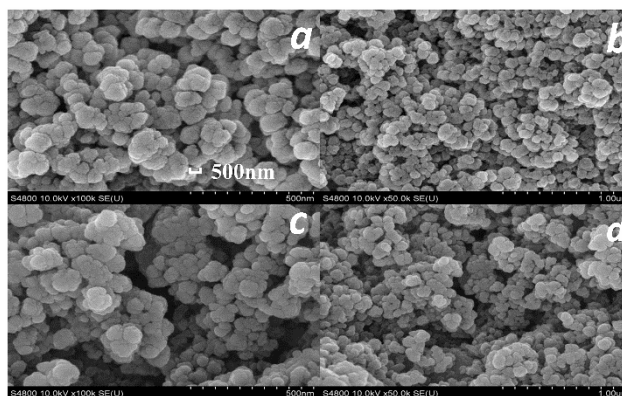

**Figure S5** Scanning electron micrograph of UiO-67-CDC (a) (b), and UiO-67-CDC-(CH<sub>3</sub>)<sub>2</sub> (c) (d).

## 7. Cell viability test

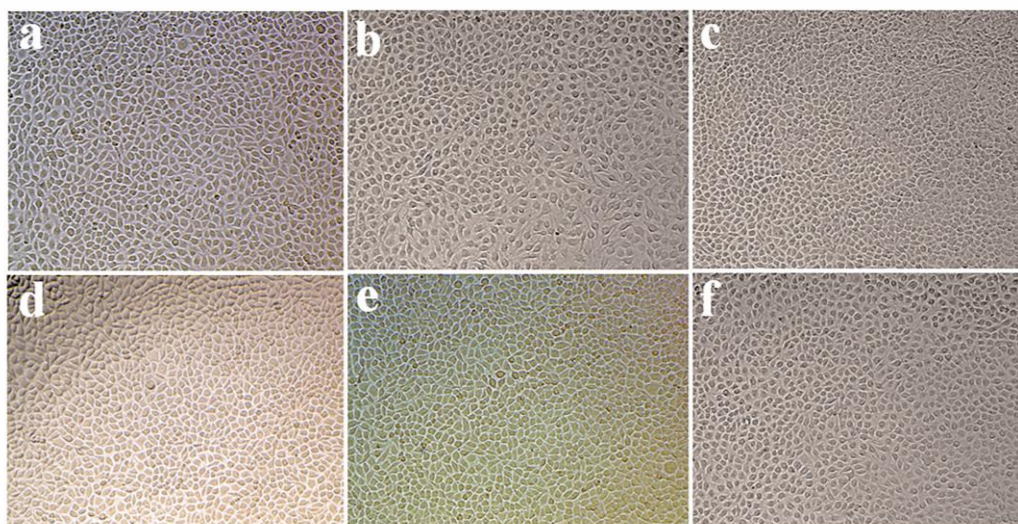

**Figure S6** Morphology of L929 cells under microscope after treatment with different concentrations of UiO-67-CDC-(CH<sub>3</sub>)<sub>2</sub>, (a) control group, (b) 20 µg/ml, (c) 40µg/ml, (d) 60 µg/ml, (e) 80 µg/ml, (f) 100 µg/ml

---

<sup>[i]</sup> Xiu-Chun Yi, Fu-Gui Xi, Kun Wang, Zhao Su, En-Qing Gao, Synthesis, structure and properties of zinc(II) coordination polymers with 9H-carbazole-2,7-dicarboxylic acid, *J. Solid State Chem*, 206 (2013) 293–299.
